# Supplementary material for: Genomic analysis of the endosomal sorting required for transport complex III pathway genes as therapeutic and prognostic biomarkers for endometrial carcinoma
Source: PubMed Central journal article supplement — Transl Cancer Res. 2022 Sep;11(9):3108–27. doi: 10.21037/tcr-22-660 (PMC9552276; doi:10.21037/tcr-22-660), 2022-09
Supplement: tcr-11-09-3108-supplementary.pdf [file tcr-11-09-3108-supplementary.pdf]

Table S1 ESCRT-III Gene Location on TISDIB dataset

| Symbol | Chromosomal Location | Location                         | Subcellular Location |         |          |              |                   |                        |                             |                  |                          |                            |   |
|--------|----------------------|----------------------------------|----------------------|---------|----------|--------------|-------------------|------------------------|-----------------------------|------------------|--------------------------|----------------------------|---|
|        |                      |                                  | Cytoplasm            | cytosol | Membrane | Lipid-anchor | Endosome membrane | Late endosome membrane | Peripheral membrane protein | Cytoplasmic side | Midbody Nucleus envelope | Cytoplasm Nucleus envelope |   |
| CHMP2A | 19q13.43             | chr19:58551566-58555124 (GRCh38) |                      |         |          |              |                   |                        | Y                           | Y                | Y                        |                            |   |
| CHMP2B | 3p 12.1              | chr3:87227271-87255548 (GRCh38)  | Y                    | Y       |          |              |                   |                        | Y                           | Y                |                          |                            |   |
| CHMP3  | 2p 11.2              | chr2:86503430-86620493 (GRCh38)  | Y                    | Y       | Y        | Y            | Y                 | Y                      | Y                           |                  |                          |                            |   |
| CHMP4B | 20q11.22             | chr20:33811304-33854366 (GRCh38) | Y                    | Y       |          |              |                   |                        | Y                           | Y                |                          | Y                          |   |
| CHMP4C | 8q21.13              | chr8:81732434-81759515 (GRCh38)  | Y                    | Y       |          |              |                   |                        | Y                           | Y                |                          | Y                          |   |
| CHMP5  | 9p13.3               | chr9:33264879-33282069 (GRCh38)  |                      | Y       |          |              |                   | Y                      | Y                           |                  |                          |                            |   |
| CHMP6  | 17q25.3              | chr17:80991598-81009517 (GRCh38) |                      |         |          | Y            |                   | Y                      | Y                           |                  |                          |                            |   |
| CHMP7  | 8p21.2               | chr8:23243637-23262000 (GRCh38)  |                      |         |          |              |                   |                        |                             |                  |                          |                            | Y |

Table S2 ESCRT-III Gene Synonyms on TISDIB dataset

| Symbol | Aliases, Synonyms                                                                                                                                                                                                                                                                                                                                                                                                                                                                                                                                                  |
|--------|--------------------------------------------------------------------------------------------------------------------------------------------------------------------------------------------------------------------------------------------------------------------------------------------------------------------------------------------------------------------------------------------------------------------------------------------------------------------------------------------------------------------------------------------------------------------|
| CHMP2A | Cytoplasmic side Note = Localizes to the midbody of dividing cells. Localized in two distinct rings on either side of the Fleming body. BC-2; CHMP2; VPS2; VPS2A; putative breast adenocarcinoma marker (32kD); VPS2 homolog A (S. cerevisiae); chromatin modifying protein 2A; BC2; VPS2 homolog A; putative breast adenocarcinoma marker BC-2; vacuolar protein sorting-associated protein 2-1; vps2-1; hVps2-1; Chromatin-modifying protein 2a                                                                                                                  |
| CHMP2B | Cytoplasm, cytosol Late endosome membrane Peripheral membrane protein DKFZP564O123; CHMP2.5; VPS2B; VPS2 homolog B (S. cerevisiae); chromatin modifying protein 2B; ALS17; VPS2-2; VPS2 homolog B; vacuolar protein-sorting-associated protein 2-2; hVps2-2; Vacuolar protein sorting-associated protein 2-2; Chromatin-modifying protein 2b                                                                                                                                                                                                                       |
| CHMP3  | Late endosome membrane Note = Localizes to the midbody of dividing cells. NEDF; CGI-149; VPS24; vacuolar protein sorting 24 (yeast); vacuolar protein sorting 24 homolog (S. cerevisiae); 25.1 protein; CHMP family, member 3; chromatin-modifying protein 3; neuroendocrine differentiation factor; vacuolar protein sorting 24 homolog; vacuolar protein sorting-associated protein 24; hVps24                                                                                                                                                                   |
| CHMP4B | Midbody Nucleus envelope Note = Recruited to the nuclear envelope by CHMP7 during late anaphase. Localizes transiently to the midbody arms immediately before abscission dJ553F4.4; Shax1; SNF7-2; VPS32B; C20orf178; chromosome 20 open reading frame 178; chromatin modifying protein 4B; CTPP3; CTRCT31; Vps32-2; SNF7 homolog associated with Alix 1; Snf7 homologue associated with Alix 1; chromatin-modifying protein 4b; hSnf7-2; hVps32-2; vacuolar protein sorting-associated protein 32-2; vacuolar protein-sorting-associated protein 32-2             |
| CHMP4C | Midbody ring Note=Localizes to the midbody during late cytokinesis. During its recruitment, localizes initially to the midbody arms, before being directed to the central region, the midbody ring, also called Flemming body. Phosphorylation at Ser-210 by AURKB triggers localization to midbody ring MGC22825; Shax3; VPS32C; Snf7 homologue associated with Alix 3; chromatin modifying protein 4C; SNF7-3; SNF7 homolog associated with Alix 3; chromatin-modifying protein 4c; hSnf7-3; hVps32-3; vacuolar protein sorting-associated protein 32-3; vps32-3 |
| CHMP5  | Peripheral membrane protein Note = Localizes to the midbody of dividing cells. Localized in two distinct rings on either side of the Fleming body HSPC177; CGI-34; Vps60; C9orf83; SNF7DC2; chromosome 9 open reading frame 83; chromatin modifying protein 5; PNAS-2; SNF7 domain containing 2; SNF7 domain-containing protein 2; apoptosis-related protein PNAS-2; chromatin-modifying protein 5; hVps60; vacuolar protein sorting-associated protein 60                                                                                                         |
| CHMP6  | Lipid-anchor Note = Localizes to endosomal membranes FLJ11749; VPS20; chromatin modifying protein 6; chromatin-modifying protein 6; hVps20; vacuolar protein sorting-associated protein 20                                                                                                                                                                                                                                                                                                                                                                         |
| CHMP7  | Cytoplasm Nucleus envelope Note = Diffused localization, with some punctate distribution, especially in the perinuclear area (PubMed:16856878). Localizes to the nucleus envelope during late anaphase MGC29816; CHMP family, member 7; chromatin-modifying protein 7                                                                                                                                                                                                                                                                                              |

**Table S3** Categories and Cases of ESCRT mutation types on TCGA-UCEC project

| Mutation categories       | Mutation types                     | CHMP2A | CHMP2B | CHMP3 | CHMP4B | CHMP4C | CHMP5 | CHMP6 | CHMP7 |
|---------------------------|------------------------------------|--------|--------|-------|--------|--------|-------|-------|-------|
| somatic mutation          | Missense                           | 36     | 41     | 30    | 26     | 40     | 23    | 30    | 58    |
|                           | Stop Gained                        | 4      | 5      | 4     | 2      | 3      | 2     | 1     | 5     |
|                           | Frameshift                         | 2      | 1      | 1     | 3      | 1      |       |       | 5     |
|                           | Stop Lost                          |        |        | 1     |        |        | 1     |       |       |
|                           | Moderate                           | 36     | 41     | 30    | 26     | 40     | 23    | 30    | 58    |
|                           | High                               | 6      | 6      | 6     | 5      | 4      | 3     | 1     | 6     |
| SSM, CNV                  | SSM Affected Cases                 | 21     | 26     | 15    | 22     | 14     | 19    | 9     | 36    |
|                           | CNV Gains                          | 26     | 11     | 8     | 22     | 14     | 21    | 53    | 3     |
|                           | CNV Losses                         | 23     | 23     | 9     | 11     | 5      | 5     | 7     | 32    |
| VEP impact mutation       | modifier                           | 22     | 31     | 16    | 12     | 9      | 16    | 3     | 43    |
|                           | moderate                           | 10     | 10     | 7     | 5      | 7      | 8     | 4     | 13    |
|                           | low                                | 4      | 4      | 3     | 5      | 2      | 3     | 5     | 6     |
|                           | high                               | 1      | 1      | 4     | 2      | 1      | 1     | 1     | 3     |
| SIFT impact mutation      | tolerated                          | 3      | 3      | 4     | 3      | 5      | 6     | 1     | 9     |
|                           | deleterious                        | 7      | 7      | 5     | 2      | 2      | 2     | 3     | 4     |
|                           | deleterious_low_confidence         |        |        |       |        |        |       |       | 1     |
|                           | tolerated_low_confidence           |        |        |       |        |        |       |       | 1     |
| Polyphen impact mutation  | benign                             | 3      | 4      | 5     | 4      | 4      | 7     | 2     | 9     |
|                           | probably_damaging                  | 5      | 7      | 3     | 1      | 2      | 1     | 2     | 3     |
|                           | unknown                            | 2      |        |       |        |        |       |       | 2     |
|                           | possibly_damaging                  | 2      | 2      | 2     |        | 1      |       | 2     | 1     |
| Consequence type mutation | non_coding_transcript_exon_variant | 8      | 9      | 11    |        |        | 5     |       | 39    |
|                           | 3_prime_UTR_variant                | 3      | 15     | 4     | 12     | 9      | 10    |       | 34    |
|                           | downstream_gene_variant            | 17     | 20     | 10    |        |        | 7     | 2     | 32    |
|                           | missense_variant                   | 10     | 10     | 7     | 5      | 7      | 8     | 4     | 13    |
|                           | upstream_gene_variant              | 5      | 1      |       |        |        | 4     |       | 13    |
|                           | intron_variant                     | 3      | 2      | 4     |        |        | 2     | 2     | 12    |
|                           | synonymous_variant                 |        | 3      | 1     | 5      | 2      | 3     | 4     | 5     |
|                           | start_lost                         |        |        | 1     |        |        |       |       |       |
|                           | 5_prime_UTR_variant                | 4      | 7      |       |        |        |       | 1     | 2     |
|                           | frameshift_variant                 |        |        |       |        |        |       |       | 2     |
|                           | splice_acceptor_variant            |        |        |       |        |        | 1     | 1     | 1     |
|                           | splice_region_variant              | 1      | 1      |       |        |        |       | 1     | 1     |
|                           | stop_gained                        | 1      | 1      |       | 1      | 1      |       |       |       |
| Type mutation             | single base substitution           | 22     | 30     | 16    | 23     | 17     | 22    | 9     | 41    |
|                           | small insertion                    |        | 3      |       |        | 1      |       |       |       |
|                           | small deletion                     |        | 2      |       | 1      | 1      |       |       | 2     |
| Variant caller mutation   | varscan2                           | 20     | 27     | 12    | 20     | 13     | 19    | 9     | 36    |
|                           | muse                               | 20     | 25     | 14    | 20     | 15     | 21    | 8     | 34    |
|                           | mutect                             | 21     |        |       |        |        |       |       | 32    |
|                           | mutect2                            |        | 29     | 15    | 20     | 19     | 22    | 8     |       |
|                           | somaticsniper                      | 18     | 23     | 10    | 16     |        | 17    | 8     | 30    |

SSM, simple somatic mutation; SNV, single nucleotide variation.



**Table S5** Relations between abundance of Tumor-infiltrating lymphocytes (TILs) and gene expression by spearman correlations in EC

| Symbol      | CHMP2A  |          | CHMP2B  |          | CHMP3   |          | CHMP4B  |          | CHMP4C  |          | CHMP5   |          | CHMP6   |          | CHMP7   |          |
|-------------|---------|----------|---------|----------|---------|----------|---------|----------|---------|----------|---------|----------|---------|----------|---------|----------|
| TISIDB      |         |          |         |          |         |          |         |          |         |          |         |          |         |          |         |          |
|             | rho     | P        |
| Act CD8     | 0.389   | <2.2e-16 | -0.086  | 0.0438   | -0.045  | 0.293    | 0.206   | 1.35e-06 | -0.144  | 0.000769 | 0.064   | 0.133    | 0.243   | 1.06e-08 | 0.099   | 0.0212   |
| Tcm CD8     | 0.09    | 0.0351   | -0.06   | 0.163    | 0.102   | 0.0169   | 0.236   | 2.58e-08 | -0.071  | 0.0977   | 0.128   | 0.0027   | 0.135   | 0.00155  | 0.026   | 0.543    |
| Tem CD8     | 0.168   | 8.14e-05 | -0.097  | 0.0228   | -0.057  | 0.184    | 0.103   | 0.0157   | -0.17   | 6.81e-05 | -0.023  | 0.596    | 0.15    | 0.000461 | -0.045  | 0.293    |
| Act CD4     | -0.232  | 4.33e-08 | 0.0329  | 3.86e-15 | 0.125   | 0.00345  | -0.03   | 0.486    | 0.136   | 0.00147  | 0.289   | 7.83e-12 | -0.153  | 0.000351 | 0.15    | 0.000458 |
| Tcm CD4     | 0.308   | 2.62e-13 | 0.064   | 0.136    | 0.087   | 0.0429   | 0.259   | 9.49e-10 | -0.013  | 0.77     | 0.166   | 1e-04    | 0.17    | 6.64e-05 | 0.132   | 0.00193  |
| Tem CD4     | -0.274  | 8.49e-11 | 0.434   | <2.2e-16 | 0.303   | 5.57e-13 | -0.008  | 0.857    | 0.186   | 1.26e-05 | 0.363   | <2.2e-16 | -0.197  | 3.78e-06 | 0.181   | 2.22e-05 |
| Tfh         | 0.158   | 0.000209 | 0.144   | 0.00074  | -0.066  | 0.124    | 0.14    | 0.00104  | -0.225  | 1.12e-07 | 0.025   | 0.554    | 0.119   | 0.00522  | -0.074  | 0.0849   |
| Tgd         | 0.264   | 4.23e-10 | 0.001   | 0.981    | 0.103   | 0.0161   | 0.219   | 2.4e-07  | -0.017  | 0.69     | 0.082   | 0.0556   | 0.211   | 7.25e-07 | 0.218   | 3.03e-07 |
| Th1         | 0.073   | 0.0864   | -0.044  | 0.305    | -0.018  | 0.675    | 0.028   | 0.515    | -0.153  | 0.000341 | 0.048   | 0.262    | 0.085   | 0.0474   | -0.102  | 0.0172   |
| Th17        | 0.215   | 4.26e-07 | -0.153  | 0.00033  | -0.089  | 0.0377   | 0.003   | 0.95     | -0.069  | 0.105    | -0.142  | 0.000882 | 0.103   | 0.0161   | -0.142  | 0.000861 |
| Th2         | -0.383  | <2.2e-16 | 0.297   | 1.7e-12  | 0.223   | 1.45e-07 | -0.194  | 5.48e-06 | 0.147   | 0.000586 | 0.142   | 0.000875 | -0.242  | 1.2e-08  | 0.103   | 0.0161   |
| Treg        | -0.035  | 0.414    | 0.035   | 0.41     | 0.081   | 0.0588   | 0.089   | 0.0382   | -0.101  | 0.018    | 0.143   | 0.000804 | 0.061   | 0.157    | 0.064   | 0.134    |
| Act B       | 0.154   | 0.000301 | -0.203  | 1.76e-06 | -0.216  | 3.75e-07 | 0.025   | 0.563    | -0.246  | 6.4e-09  | -0.084  | 0.0501   | 0.111   | 0.00957  | -0.129  | 0.00263  |
| Imm B       | 0.018   | 0.676    | -0.077  | 0.0736   | -0.092  | 0.0317   | -0.026  | 0.537    | -0.207  | 1.08e-06 | 0.034   | 0.432    | -0.029  | 0.5      | -0.163  | 0.000132 |
| Mem B       | -0.332  | 2.18e-15 | 0.132   | 0.00204  | 0.133   | 0.00181  | -0.083  | 0.0516   | -0.027  | 0.528    | -0.01   | 0.809    | -0.134  | 0.0017   | -0.098  | 0.0214   |
| NK          | 0.076   | 0.0746   | 0.011   | 0.79     | 0.107   | 0.0121   | 0.119   | 0.00551  | -0.124  | 0.00376  | 0.048   | 0.261    | 0.141   | 0.000967 | 0.051   | 0.231    |
| CD56bright  | 0.325   | 8.43e-15 | -0.028  | 0.515    | 0.084   | 0.0486   | 0.269   | 2.13e-10 | -0.054  | 0.205    | 0.106   | 0.0135   | 0.216   | 3.6e-07  | 0.161   | 0.000161 |
| CD56dim     | 0.434   | <2.2e-16 | -0.356  | 4.95e-18 | -0.216  | 3.89e-07 | 0.372   | <2.2e-16 | -0.177  | 3.15e-05 | -0.126  | 0.00325  | 0.355   | 8.26e-18 | -0.09   | 0.0361   |
| MDSC        | 0.281   | 2.67e-11 | -0.17   | 7.04e-05 | -0.083  | 0.0538   | 0.164   | 0.000119 | -0.225  | 1.11e-07 | -0.02   | 0.646    | 0.24    | 1.46e-08 | 0.029   | 0.497    |
| NKT         | -0.005  | 0.902    | 0.021   | 0.63     | -0.049  | 0.257    | 0.046   | 0.279    | -0.192  | 6.16e-06 | 0.071   | 0.0985   | -0.012  | 0.778    | -0.07   | 0.104    |
| Act DC      | 0.233   | 3.93e-08 | 0.048   | 0.262    | 0.056   | 0.192    | 0.286   | 1.13e-11 | -0.086  | 0.0448   | 0.179   | 2.74e-05 | 0.177   | 3.38e-05 | 0.038   | 0.375    |
| pDC         | 0.239   | 1.72e-08 | 0.133   | 0.00188  | 0.08    | 0.0632   | 0.165   | 0.000105 | -0.1    | 0.0199   | 0.093   | 0.029    | 0.102   | 0.0174   | 0.081   | 0.06     |
| iDC         | 0.06    | 0.162    | 0.315   | 7e-14    | 0.357   | 4.14e-18 | 0.061   | 0.152    | 0.106   | 0.0133   | 0.275   | 7.85e-11 | -0.127  | 0.00291  | 0.211   | 6.9e-07  |
| Macrophage  | 0.212   | 6.41e-07 | -0.123  | 0.00403  | -0.076  | 0.0769   | 0.14    | 0.00109  | -0.243  | 9.26e-09 | -0.05   | 0.241    | 0.219   | 2.59e-07 | -0.063  | 0.14     |
| Eosinophil  | 0.103   | 0.0165   | 0.001   | 0.974    | -0.099  | 0.0208   | -0.099  | 0.0213   | -0.2    | 2.49e-06 | 0.047   | 0.272    | -0.007  | 0.868    | -0.087  | 0.0425   |
| Mast        | 0.164   | 0.00012  | -0.115  | 0.00732  | -0.074  | 0.0828   | 0.027   | 0.527    | -0.178  | 3.11e-05 | -0.127  | 0.00291  | 0.108   | 0.0113   | 0.018   | 0.617    |
| Monocyte    | 0.486   | <2.2e-16 | -0.131  | 0.00217  | -0.011  | 0.805    | 0.316   | 5.37e-14 | -0.136  | 0.00148  | 0.003   | 0.951    | 0.465   | <2.2e-16 | 0.184   | 1.6e-05  |
| Neutrophil  | 0.101   | 0.0187   | -0.106  | 0.013    | -0.117  | 0.00628  | 0.024   | 0.581    | -0.12   | 0.00489  | -0.109  | 0.0106   | 0.048   | 0.263    | -0.14   | 0.00101  |
| GEPIA2021   |         |          |         |          |         |          |         |          |         |          |         |          |         |          |         |          |
|             | F       | p        | F       | p        | F       | p        | F       | p        | F       | p        | F       | p        | F       | p        | F       | p        |
| UCEC tumor  | 577.17  | <1e-15   | 451.02  | <1e-15   | 680.18  | <1e-15   | 533.94  | <1e-15   | 590.94  | <1e-15   | 688.49  | <1e-15   | 393.59  | <1e-15   | 786.80  | <1e-15   |
| UCEC normal | 83.86   | <1e-15   | 137.56  | <1e-15   | 163.87  | <1e-15   | 128.64  | <1e-15   | 222.59  | <1e-15   | 207.66  | <1e-15   | 46.59   | <1e-15   | 193.17  | <1e-15   |
| Uterus      | 2022.39 | <1e-15   | 1686.46 | <1e-15   | 2523.61 | <1e-15   | 1657.34 | <1e-15   | 1572.16 | <1e-15   | 2213.29 | <1e-15   | 1499.31 | <1e-15   | 2643.63 | <1e-15   |

**Table S6** Survival analysis of ESCRT genes in EC patients

| Dataset | Symbol     | CHMP2A | CHMP2B | CHMP3 | CHMP4B | CHMP4C | CHMP5 | CHMP6 | CHMP7 |
|---------|------------|--------|--------|-------|--------|--------|-------|-------|-------|
| TCGA    | p          | 0.2    | 0.1    |       | 0.037  | 0.86   | 0.69  | 0.13  | 0.19  |
| TISIDB  | Log-rank p | 0.0203 | 0.274  | 0.183 | 0.118  | 0.101  | 0.426 | 0.28  | 0.984 |
| GEPIA   |            |        |        |       |        |        |       |       |       |
| OS      | Log-rank p | 0.14   | 0.91   | 0.85  | 0.45   | 0.22   | 0.68  | 0.97  | 0.14  |
|         | HR (high)  | 0.6    | 0.91   | 1.1   | 1.3    | 0.64   | 0.86  | 0.99  | 0.59  |
| DFS     | Log-rank p | 0.016  | 0.12   | 0.97  | 0.89   | 0.16   | 0.17  | 0.19  | 0.027 |
|         | HR (high)  | 0.44   | 0.6    | 0.99  | 1      | 0.63   | 0.63  | 0.64  | 0.47  |

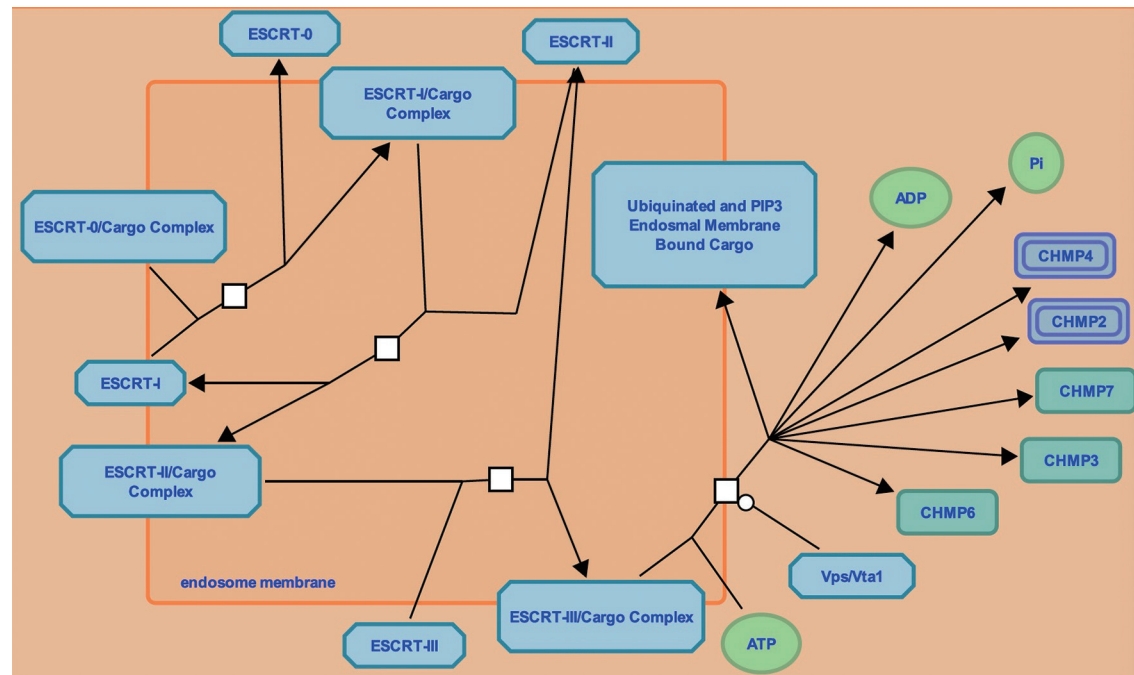

**Figure S1** Endosomal sorting required for transport complex III (ESCRT-III) pathway. Cited from: TISIDB (<http://cis.hku.hk/TISIDB/index.php>). ESCRT, endosomal sorting complex required for transport, CHMP, charged multivesicular body protein.

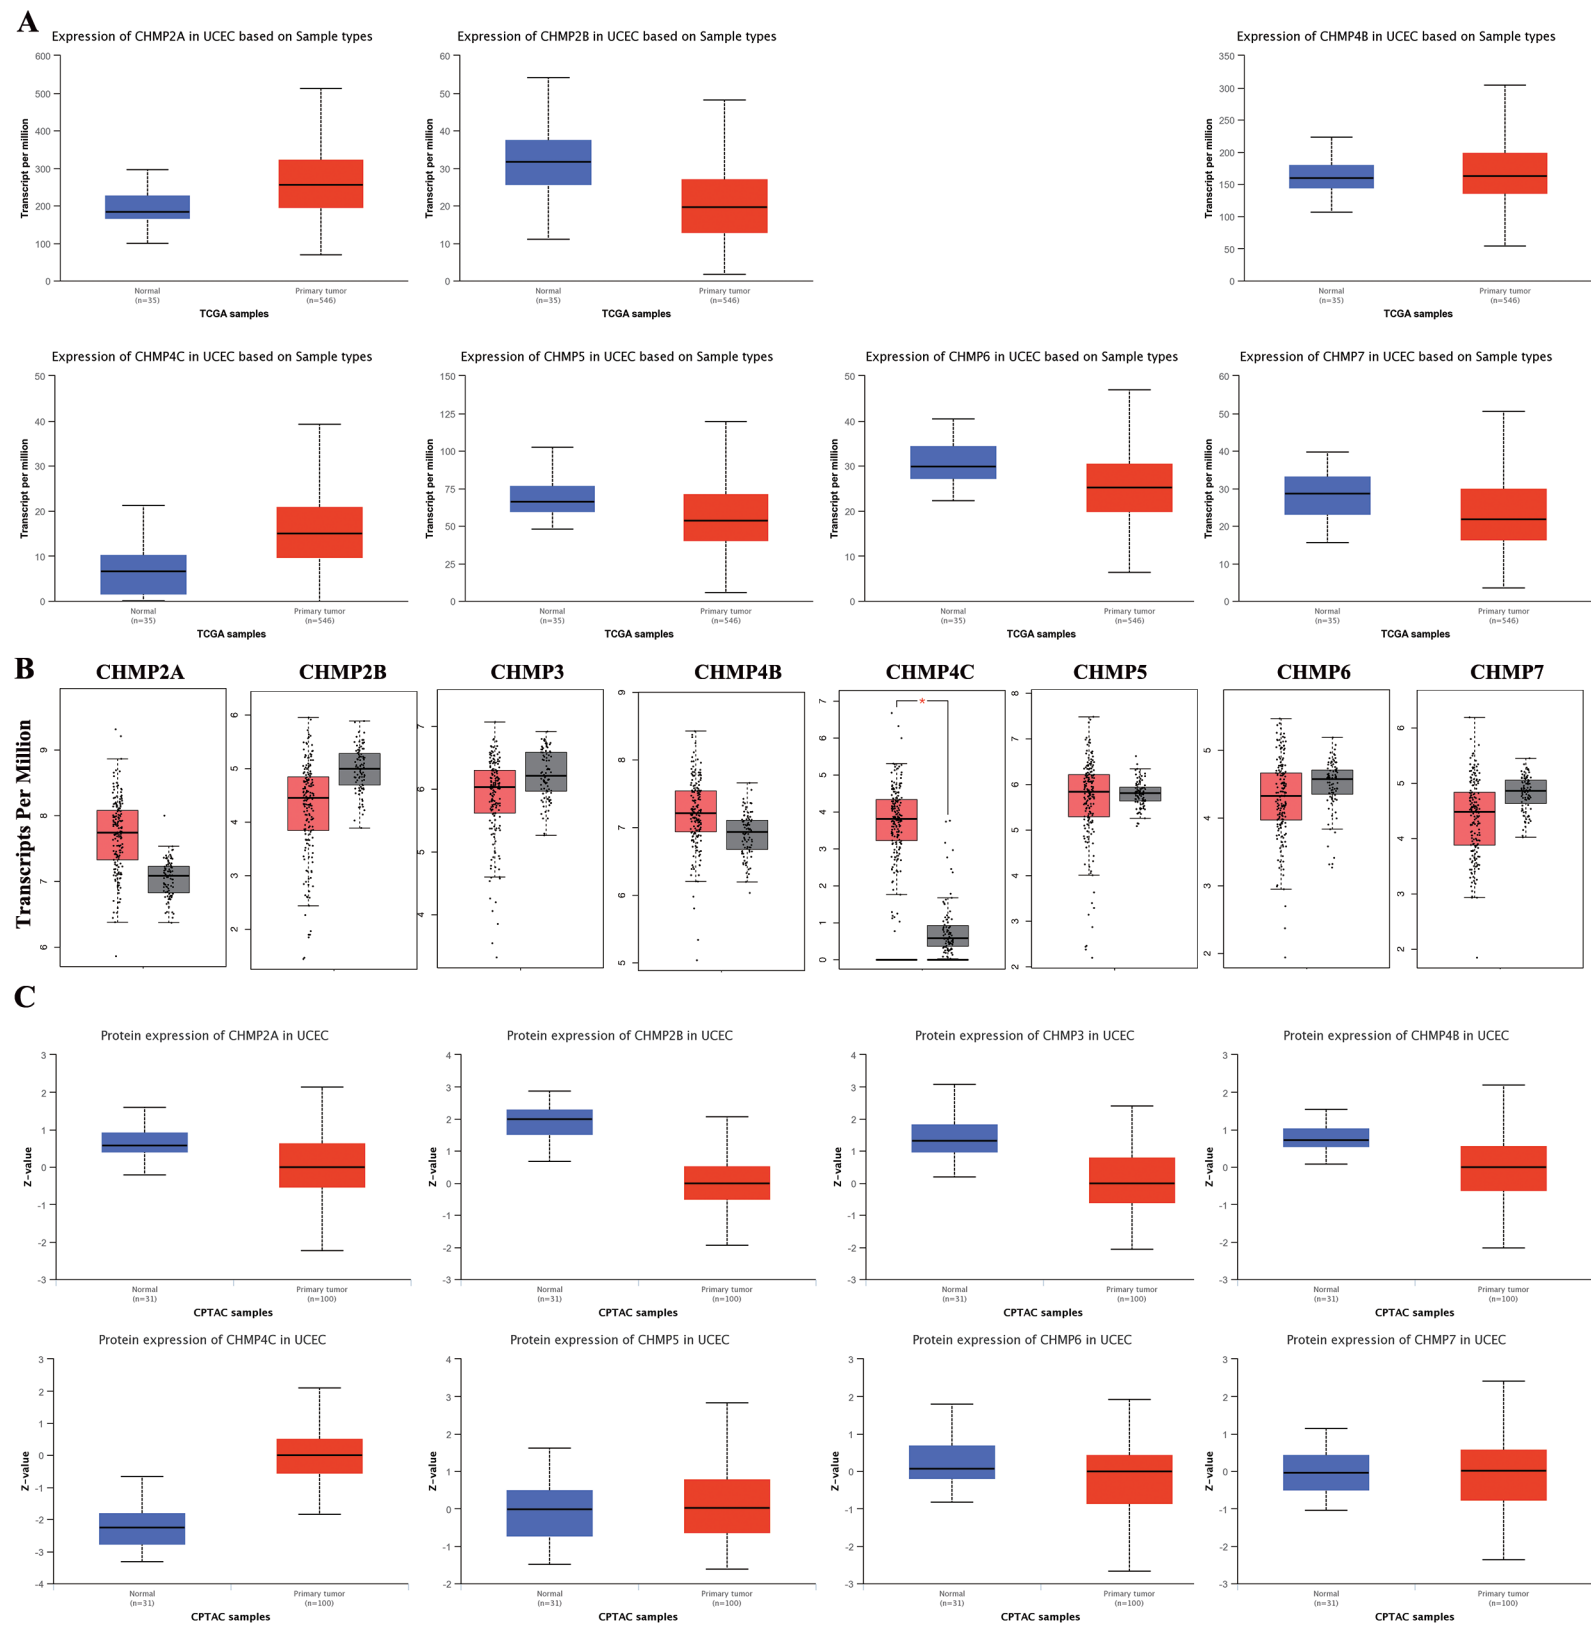

**Figure S2** A comparison of the expression levels of the endosomal sorting complex required for transport (ESCRT) pathway genes between EC and normal endometrial tissue samples. The gene expression profile across tumor samples and paired normal tissues are displayed by bar plot. The height of bar represents the median expression of EC tumor type or normal tissue. The X axis represents the association between ESCRT pathway gene expression in EC and normal endometrial tissue, while the Y axis represents the TPM (A), in UALCAN analysis on TCGA-UCEC database, and (B), in GEPIA analysis on TCGA-UCEC and GTEx- Uterus database. (C) Z-values represent the standard deviations from the median of Z-values across EC and normal group samples. \*,  $P < 0.05$  compared with normal endometrial tissues with boxplots. TPM: Transcripts Per Million; ESCRT: endosomal sorting complex required for transport; CHMP: charged multivesicular body protein; TCGA: dataset of the Cancer Genome Atlas database; UCEC: uterine corpus endometrial carcinoma.



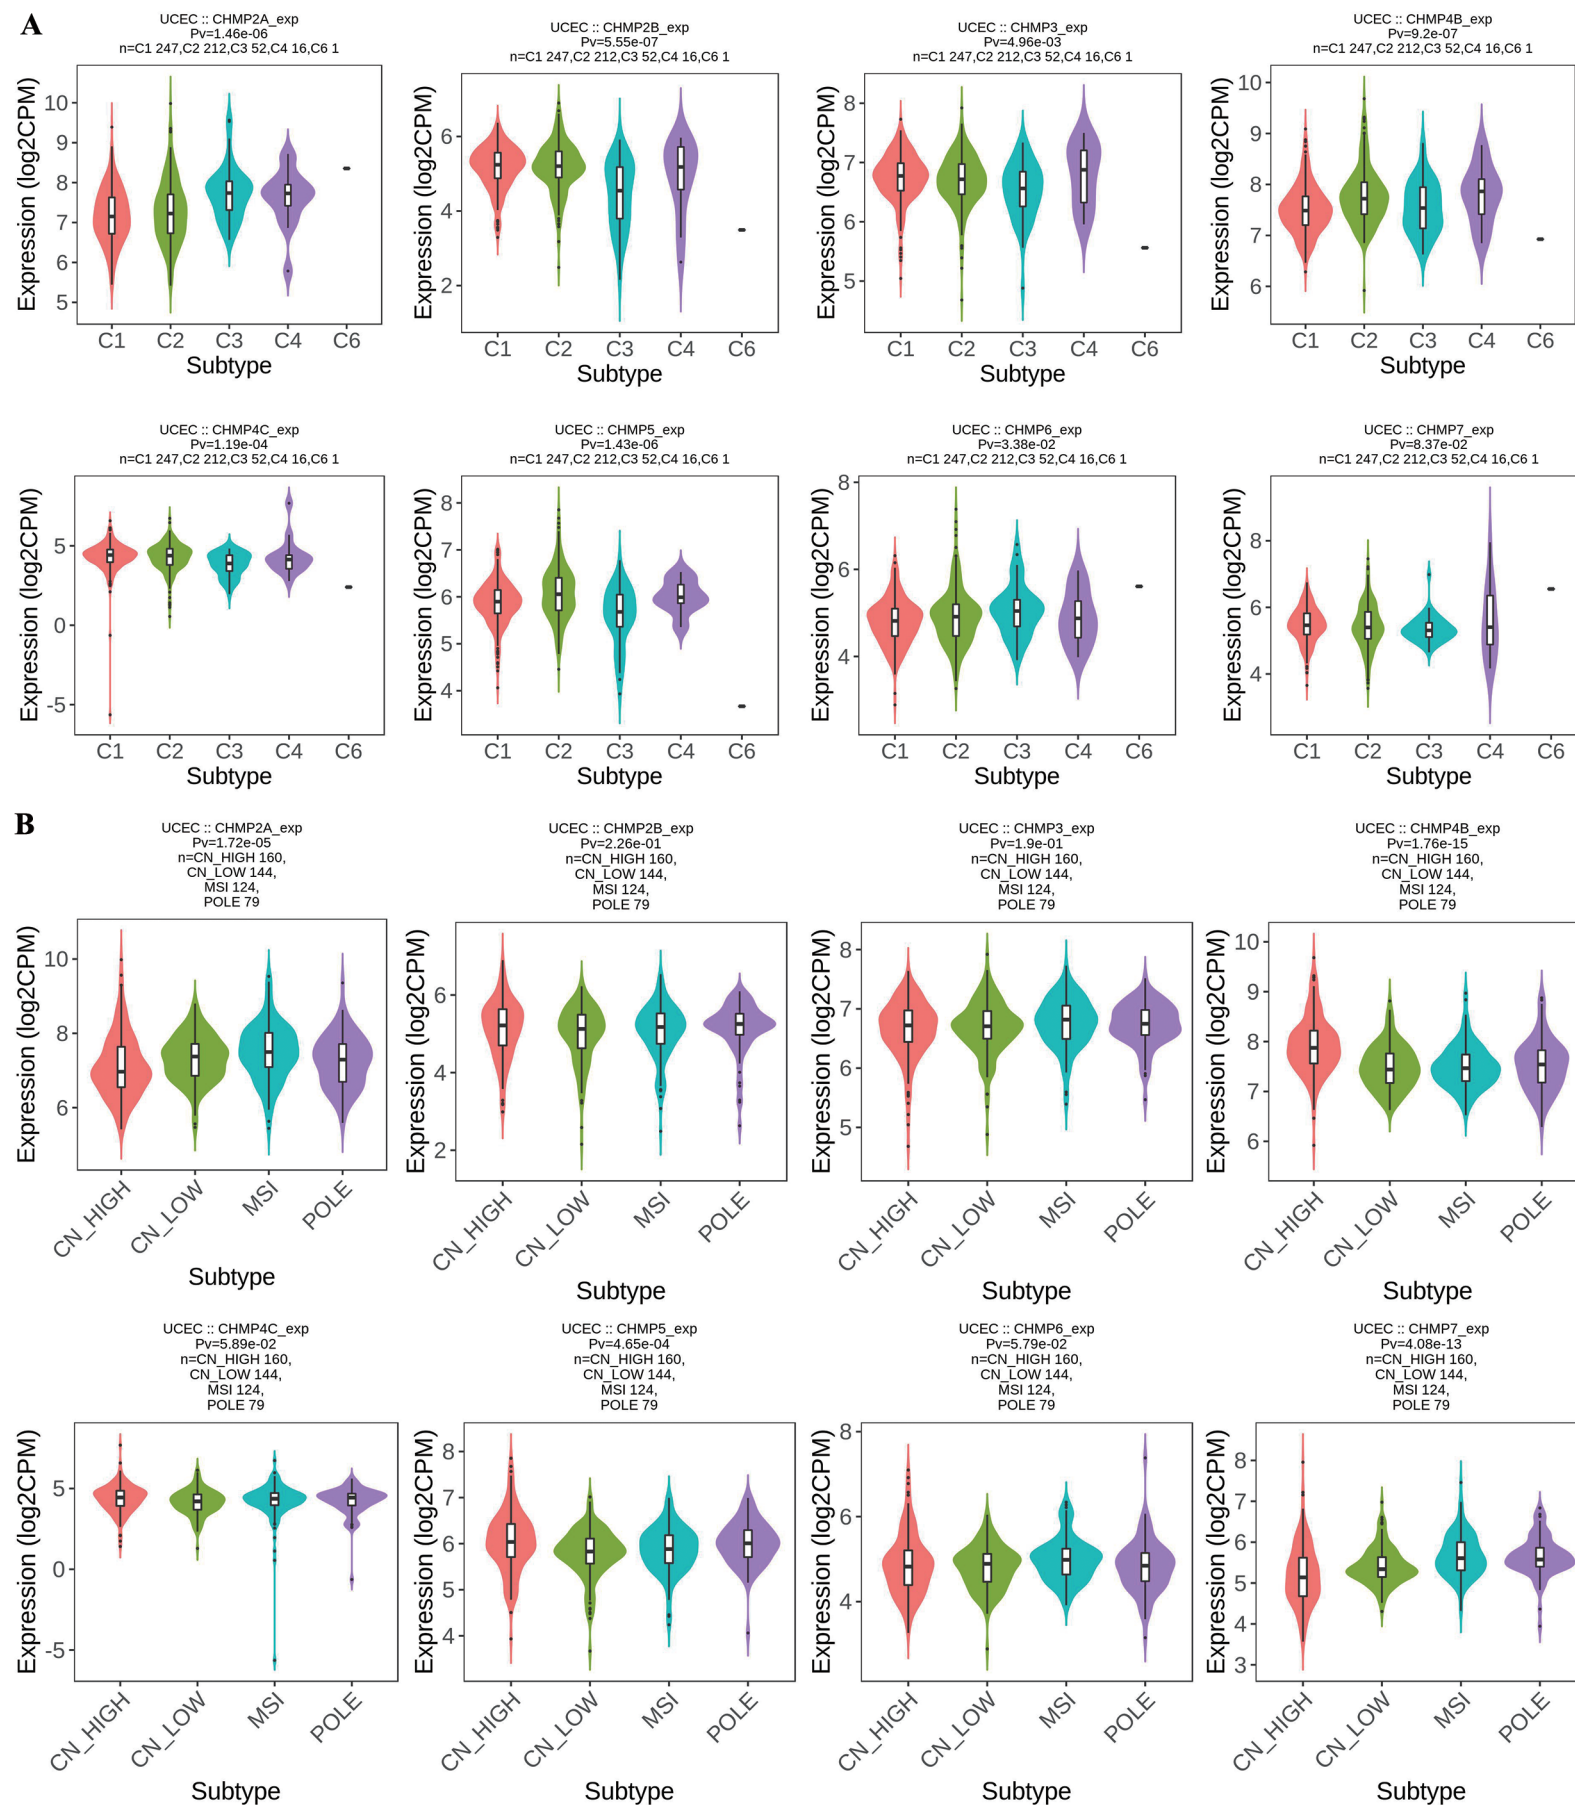

**Figure S3** Association between the ESCRT pathway gene expression and the EC immune and molecular subtype. The Y axis represents the log2CPM of expression, which has been determined by the Kruskal-Wallis test  $-\log_{10}(p\text{-value})$ . (A) Immune subtype: C1 (wound healing) (n=247); C2 (IFN-gamma dominant) (n=212); C3 (inflammatory) (n=52); C4 (lymphocyte depleted) (n=16); C5 (immunologically quiet) (n=0); C6 (TGF- $\beta$  dominant) (n=1). (B) Molecular subtype: Molecular subtype: POLE (DNA polymerase epsilon) (n=79), low copy number (CN-LOW) (n=144), high copy number (CN-HIGH) (n=160), and microsatellite instability (MSI) (n=124).

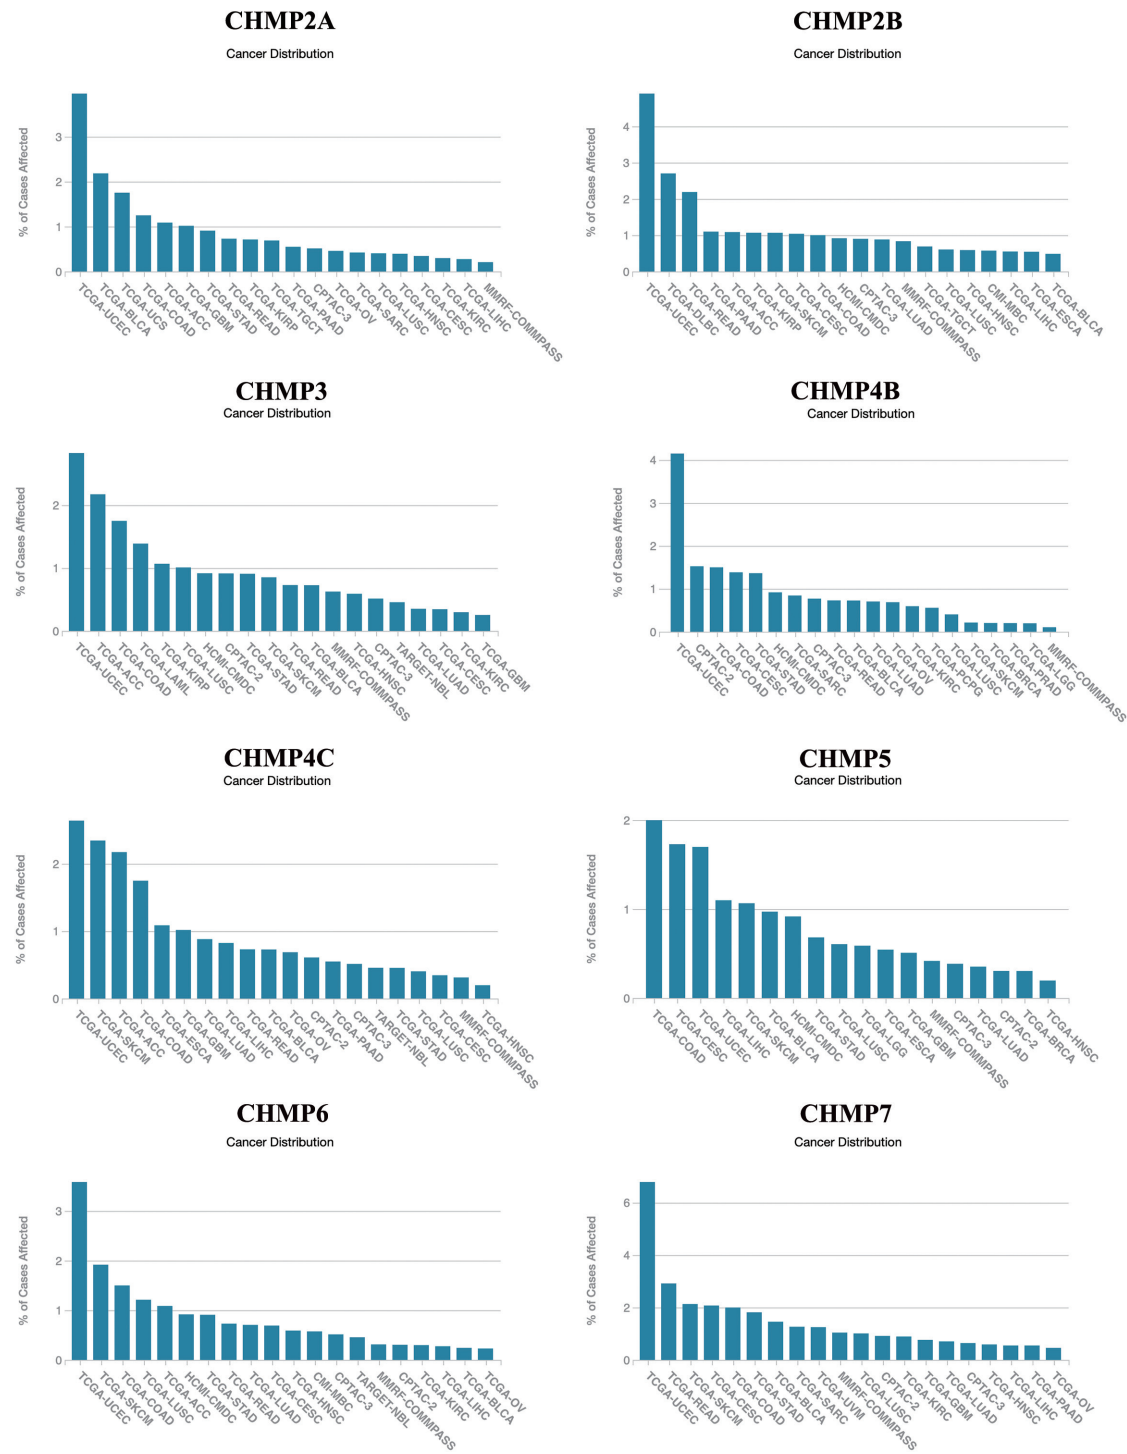

Figure S4 Correlations among the ESCRT pathway gene expression with Transcripts Per Million (TPM) by Pearson correlation analysis.



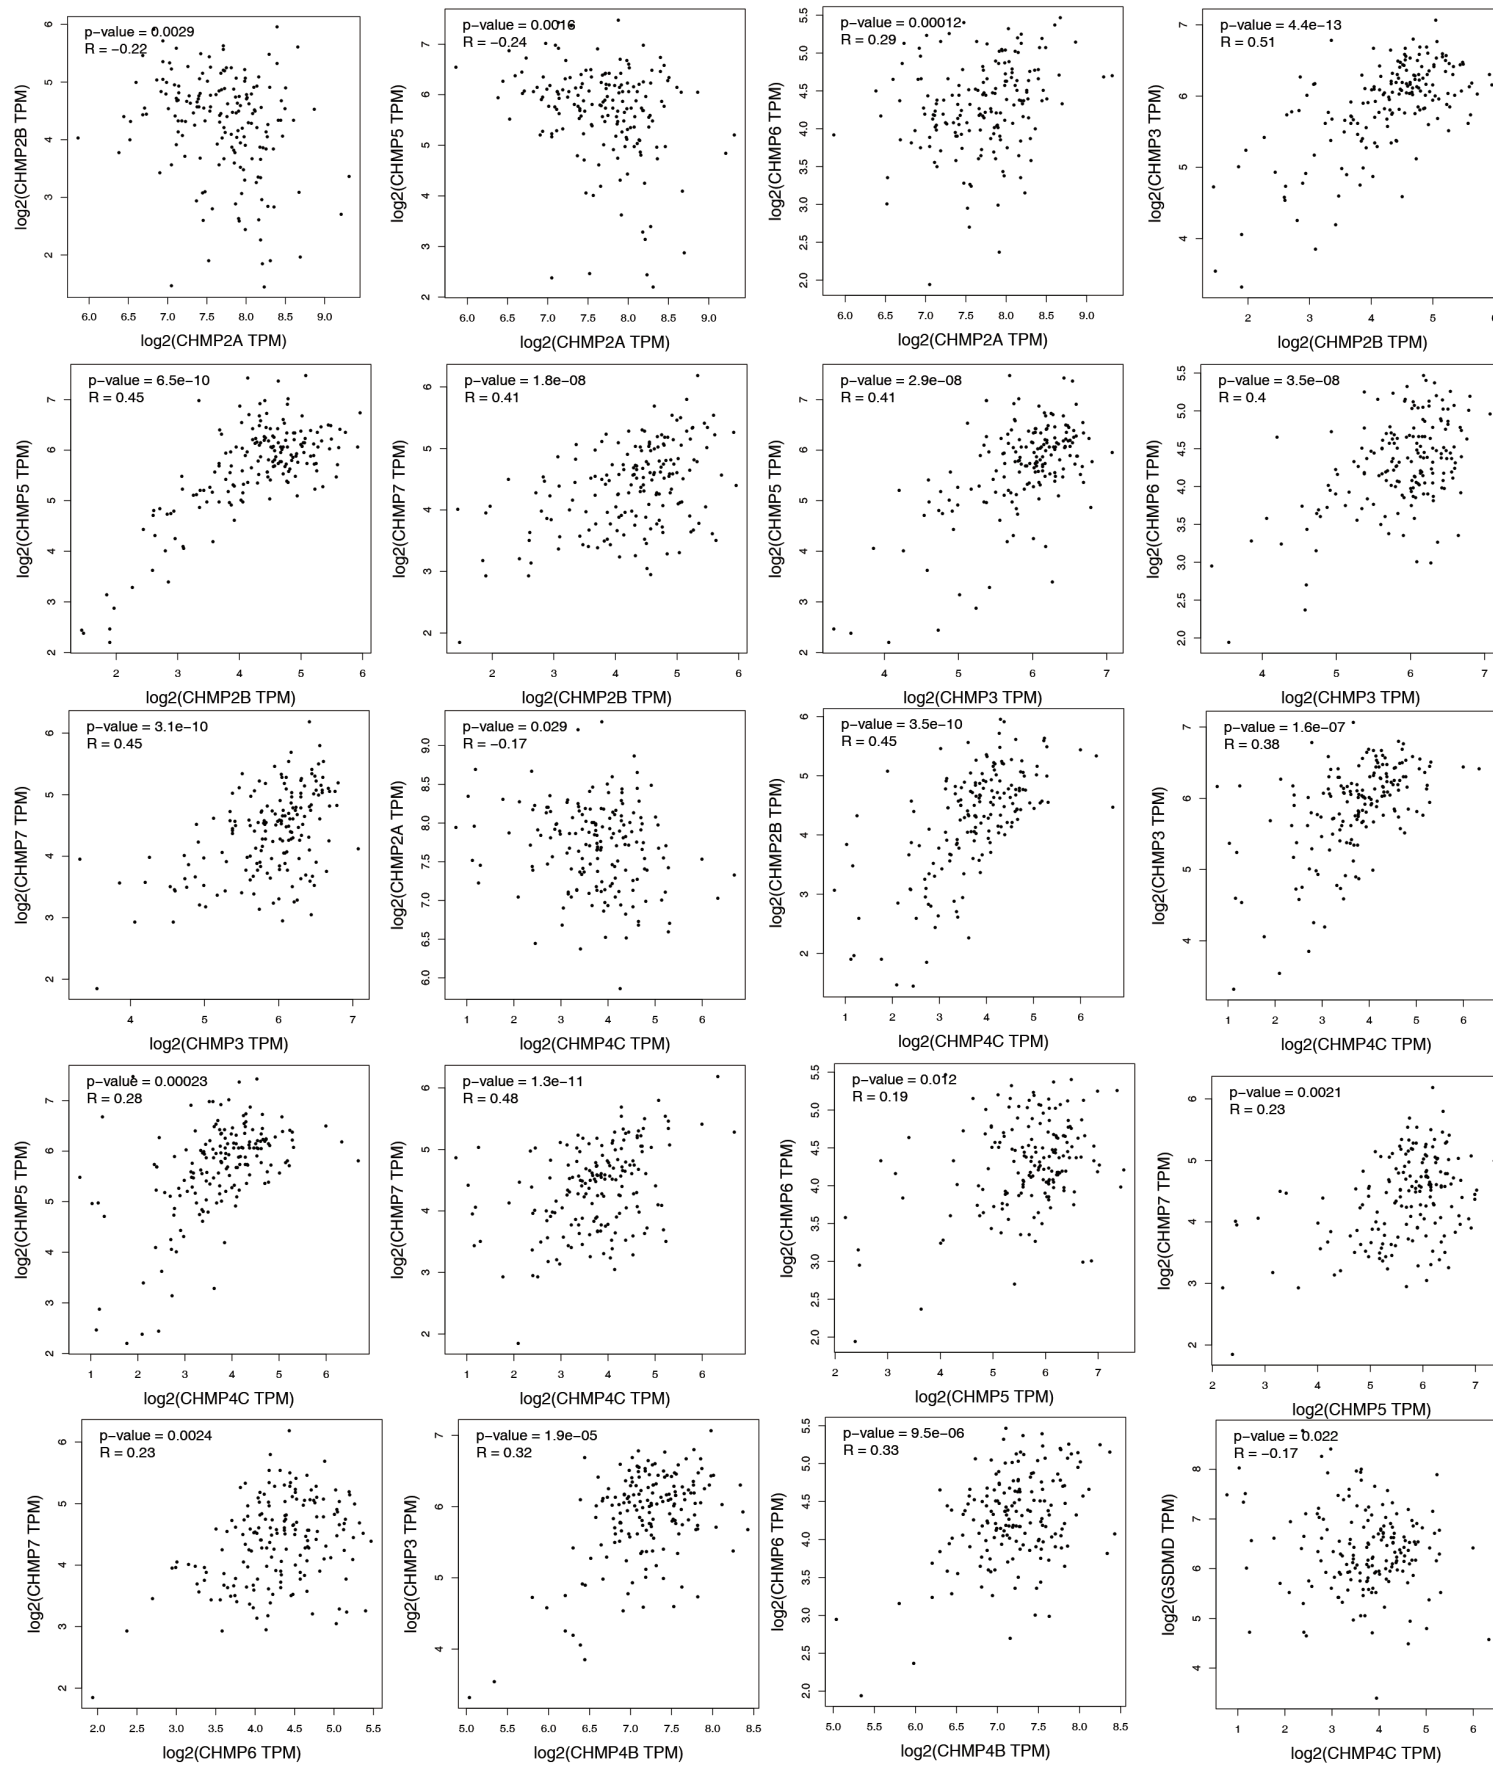

**Figure S5** The ESCRT pathway gene mutations across different cancer types compared with those in EC. This was based on the TCGA database. Different genes are represented in the waterfall plot column. ACC, Adrenocortical carcinoma, BRCA, Breast invasive carcinoma, BLCA, Bladder urothelial carcinoma, CESC, Cervical squamous cell carcinoma, COAD, Colon adenocarcinoma, CPTAC-2, CPTAC-Breast, Colon, Ovary, CPTAC-3, CPTAC-Brain, Head and Neck, Kidney, Lung, Pancreas, Uterus, CMI-MBC, Count Me In (CMI): The Metastatic Breast Cancer (MBC) Project, DLBC, Lymphoid Neoplasm Diffuse Large B-cell Lymphoma, ESCA, Esophageal carcinoma, GBM, Glioblastoma multiforme, HNCMI-CMDC, NCI Cancer Model Development for the Human Cancer Model Initiative, HNSC, Head and Neck squamous cell carcinoma, KIRC, Kidney renal clear cell carcinoma, KIRP, Kidney renal papillary cell carcinoma, LAML, Acute Myeloid Leukemia, LUAD, Lung adenocarcinoma, LUSC, Lung squamous cell carcinoma, LIHC, Liver Hepatocellular Carcinoma, LGG, Brain Lower Grade Glioma, MMRF-COMMPASS, Multiple Myeloma CoMMpass Study, OV, Ovarian serous cystadenocarcinoma, PAAD, Pancreatic adenocarcinoma, PRAD, Prostate adenocarcinoma, READ, Rectum adenocarcinoma, SARC, Sarcoma, STAD, Stomach adenocarcinoma, SKCM, Skin cutaneous melanoma, TARGET-NBL, Neuroblastoma, TGCT, Testicular Germ Cell Tumors, UCS, Uterine carcinosarcoma, UCEC, Uterine corpus endometrial carcinoma.

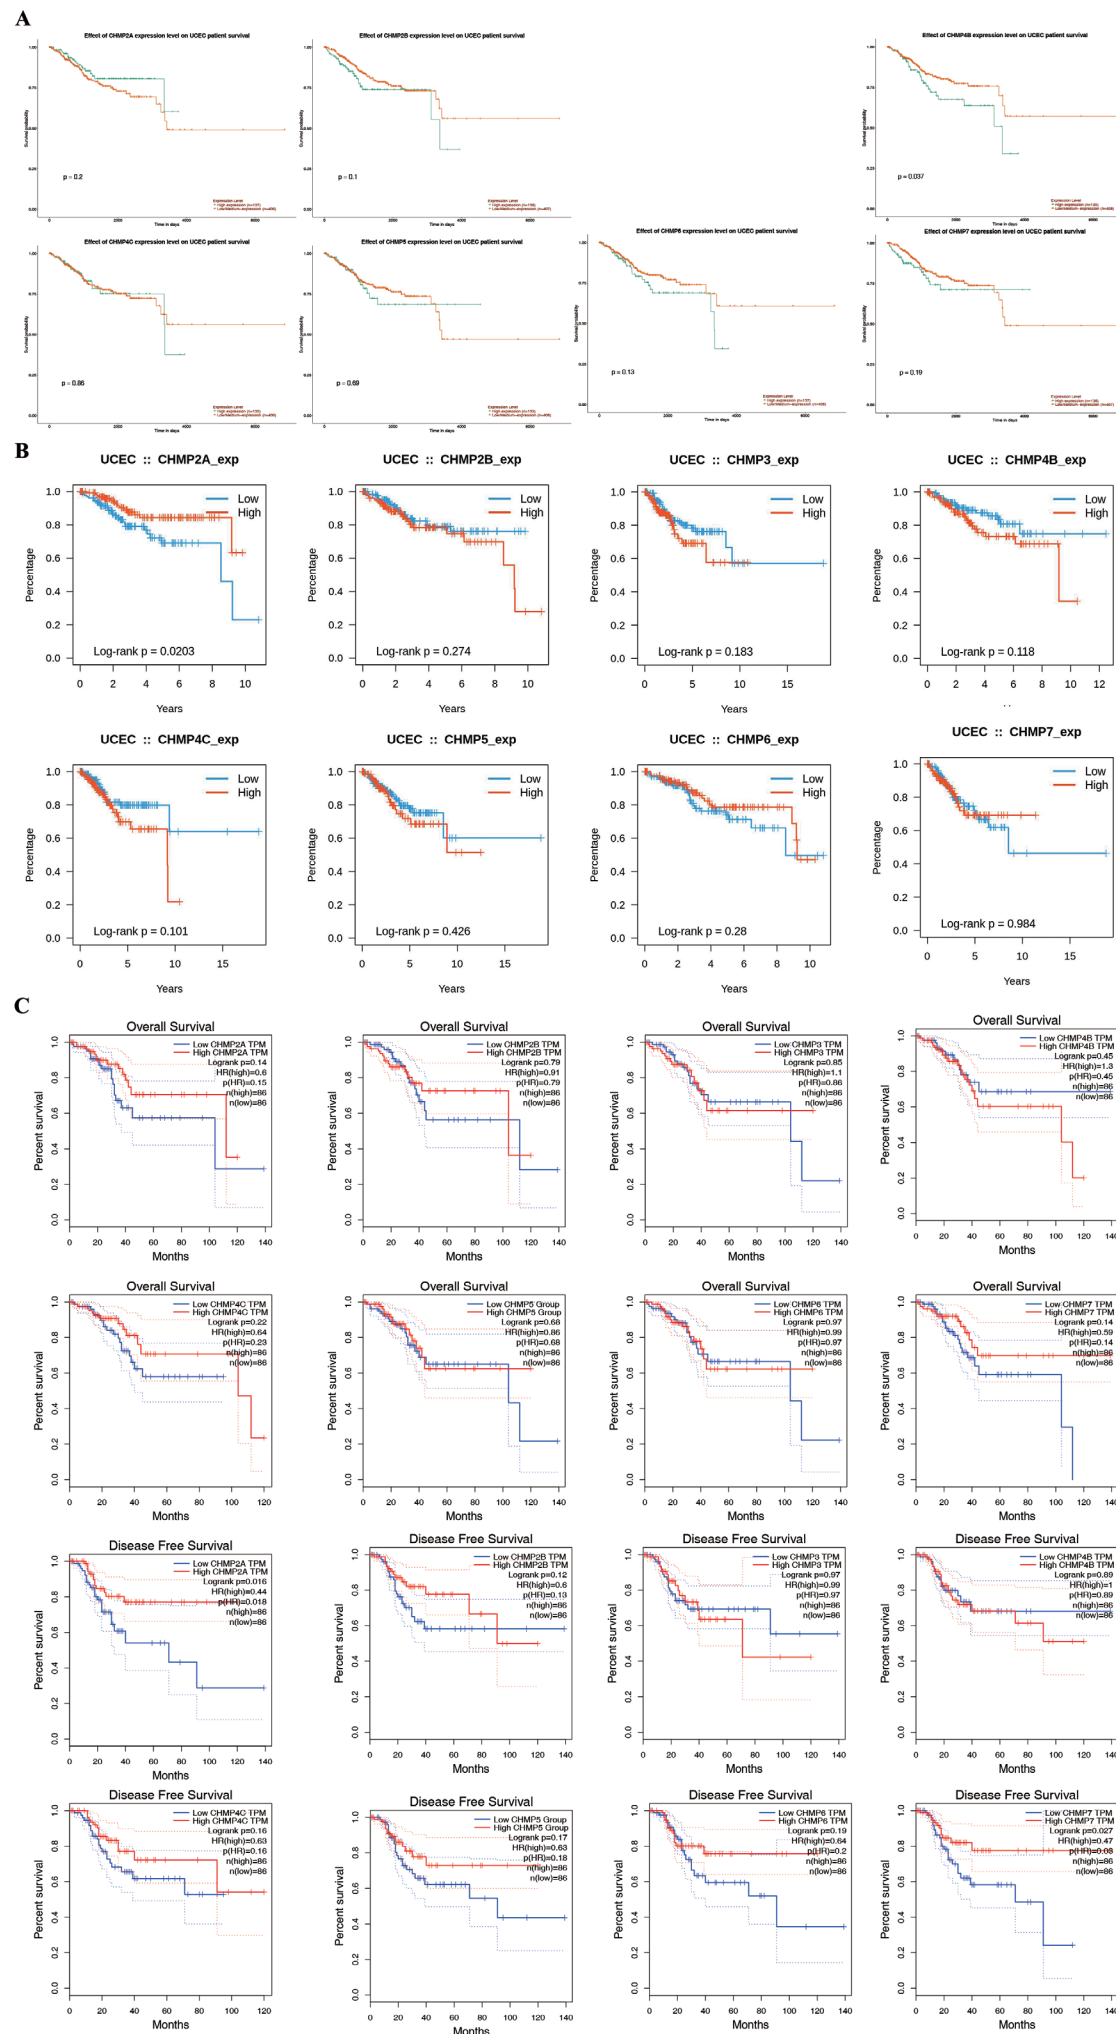

**Figure S6** The survival analysis of the ESCRT genes. (A) Kaplan-Meier survival analysis for OS in UALCAN; (B) OS in TISDIB; (C) Univariate cox-regression analysis for OS and DFS in GEPIA Row: Percentage of survival, Column Axis Units: (A) Days; (B) Years; (C) Months. HR, Hazard Ratio.

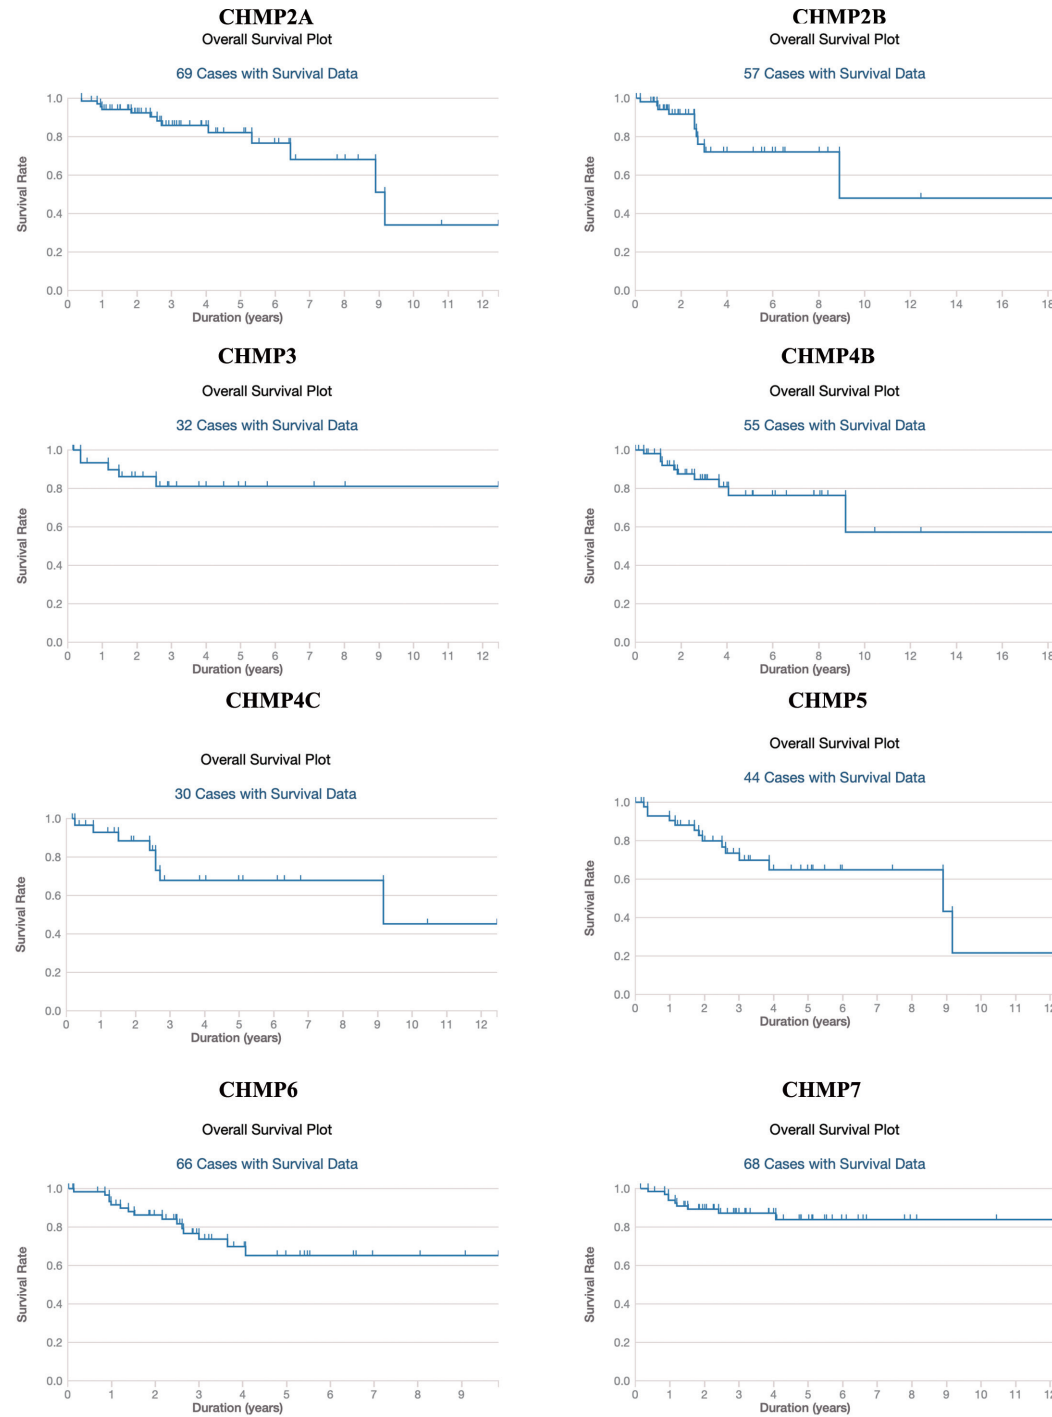

**Figure S7** Survival analysis on ESCRT-III mutation genes: CHMP2A, CHMP2B, CHMP3, CHMP4B, CHMP5, CHMP6, CHMP7.
